# Supplementary material for: The Dawn of next generation DNA sequencing in myelodysplastic syndromes- experience from Pakistan
Source: BMC Genomics. 2021 Dec 16;22:903. doi: 10.1186/s12864-021-08221-w (PMC8679965; doi:10.1186/s12864-021-08221-w)
Supplement: Supplementary file 1 — Additional file 1 Supplementary Table S1. Rare Frequency varints in MDS Patients. [file 12864_2021_8221_MOESM1_ESM.xlsx]

## Sheet: Sheet1
Patient ID	Age	Gender	Hb (g/dL)	TLC	PLT	BLASTS	ANC	Neutrophils	Cytogenetics	B.M. Diagnosis	Treatment	Status	NGS
1	52	male	13	9.1	155	0.25	2.2	25	ck,hyperdiploidy,(18/43),XY,del &q21.3,-17,-18-,-20,-22	RAEB-I	GCSF then lena gvn,now on leucovorin	expire	no
2	22	female	8.5	3.12	211	<5%	1.06	0.34	NK	mds RA	folic acid ,qalsan D	expire	p.Ile428Thr(het) RunX1
3	59	male	7.7	2	41	35	0.4	0.2	48 xy,del 5q+8,+11,del 20q,/47xydel5q,+8,del 20q(08)/46xy,del 5q,del20q	RAEB -II	regular blood tx.,lenalidomide	expire	p.Pro384Leu (het) RunX1
4	25	male	8.5	4	40	<5%	1.8	45	NK	RCMD	regular blood transfusion	na	no
5	53	female	11.2	8.4	43	<5%	4.62	0.55	ck,47xx,+1,+2,+3,+5,del6q	RCMD	folic acid,methlycobal	alive	no
6	38	male	8.8	7	115	0.08	4.27	61	NK	RAEB -II	Epo 10,000	lost to fu	no
7	29	female	9.3	4.93	36	<5%	2.8	58	NK	RCMD	lenalidomide	expire	p. Pro75Leu CDKN2A
8	20	male	10	9.1	129	<5%	6	0.66	del5q	MDS RA	delta,acyclovir,neoral,blood tx	alive	no
9	48	male	9.1	1.31	33.5	0.85	1.6	0.05	NK	RAEB -II	regular blood tx.,vit 6	expire	p. Arg107His RunX1,p.Pro75His CDKN2A,p.Thr358Pro GATA2
10	65	female	7.9	1.9	19	<5%	0.2	0.13	del5q31	RCMD	linalidomide 5mg for 3 weeks,EPO >200 given,on vidaza 117 mg	expire	Tet-2 c5162 T>G mutation
11	25	male	6.5	3.8	159	<5%	1.45	0.38	NK	MDS-U	leucovorin,vit b6	alive	no
12	46	female	9	2.88	326	<5%	0.6	0.23	NK	RCMD	12,F.a	alive	no
13	57	male	8.7	6.1	6	<5%	4.02	0.66	del7q	RCMD	on regular blood tx	expire	p.Gln1039Ter (het) ASXL1
14	60	male	10.5	1.1	25	<5%	0.25	0.23	trisomy 8	RCMD	erythropoietin,blood tx.,vidaza	alive	no
15	32	male	7.8	21	36		7.35	0.35	del7q22	RAEB -II	regular transfusion	expire	p.Gly12Ser NRAS
16	45	female	8.2	4.1	148	<5%	1.8	0.45	NK	RCMD	chemo	death	DNMT3A
17	81	male	8.9	2.9	121	<5%	0.84	0.29	monosomy 20	RCMD	on bloo tx	alive	no
18	43	male	6.7	20.2	11	0.1	14.3	0.71	NK	RAEB -II	chemo	alive	NRAS p.G12S
19	15	male	8.4	21.5	82	0.12	11.8	0.55	NK	RAEB -II	hematinics	alive	NRAS p.G12S
20	56	male	7.5	5.9	114	<5%	3.8	0.65	NK	RARS	epo/blood tx	alive	no
21	65	male	6	6.9	72	0.04	3.8	0.56	del5q	RAEB -II	azacyditine	alive	ASXL1 C2077C>T,BCORL1 C.331T>C,TET2 c.1064G>A
22	45	male	11.3	68.04	55	0.9	0.9	0.06	NK	mds-aml	flt-3 ITD	alive	BCORL1 c.3315T>C,EZH2c.553G>C
